# Supplementary material for: Turbidity maximum zone index: A novel model for remote extraction of turbidity maximum zone in different estuaries
Source: Copernicus journal article supplement (doi:10.5194/gmd-2020-378), 2021-05-26
Supplement: Supplementary file [file gmd-2020-378-AC2-supplement.pdf]

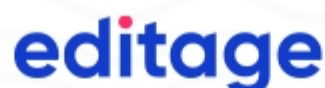

# Editing Certificate

This document certifies that the manuscript listed below has been edited to ensure language and grammar accuracy and is error free in these aspects. The edit was performed by professional editors at Editage, a division of Cactus Communications. The author's core research ideas were not altered in any way during the editing process. The quality of the edit has been guaranteed, with the assumption that our suggested changes have been accepted and the text has not been further altered without the knowledge of our editors.

#### MANUSCRIPT TITLE

**Turbidity maximum zone index: A novel model for remote extraction of turbidity maximum zone in different estuaries**

#### AUTHORS

**Chongyang Wang, Li Wang, Danni Wang, Dan Li, Chenghu Zhou, Hao Jiang, Qiong Zheng, Shuisen Chen, Kai Jia, Yangxiaoyue Liu, Ji Yang, Xia Zhou and Yong Li**

#### ISSUED ON

**June 30, 2021**

#### JOB CODE

**GYGCH\_2**

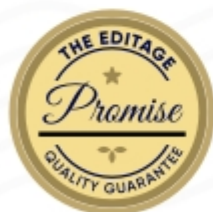

*Vikas Narang*

**Vikas Narang**  
Chief Operating Officer - Editage

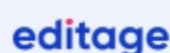

Editage, a brand of Cactus Communications, offers professional English language editing and publication support services to authors engaged in over 1300 areas of research. Through its community of experienced editors, which includes doctors, engineers, published scientists, and researchers with peer review experience, Editage has successfully helped authors get published in internationally reputed journals. Authors who work with Editage are guaranteed excellent language quality and timely delivery.

**GLOBAL :**  
(833) 979-0061 | request@editage.com

**CHINA :**  
400-120-3020 | fabiao@editage.cn

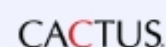

 impact.science

 researcher.life

 lifesciences.cactusglobal.com

**Reviewer #1:**

*The paper developed an index called turbidity maximum zone index (TMZI) and defined it as the ratio of the difference and sum of logarithmic transformation of TSS (total suspended solids) concentrations and chlorophyll concentrations. Through the experiments in Pearl River Estuary (PRE), Hanjiang River Estuary (HRE) and Moyangjiang River Estuary (MRE) in Guangdong Province of China, the paper confirmed that the TMZI index (>0.2) effectively distinguished turbidity maximum zones (TMZs) in these estuaries.*

*Moreover, the paper illustrated how to extract TSS and chlorophyll from Landsat TM and OLI images. The paper clearly explained the methodology, logically carried out the validation tests, and well presented the validation results. The graphics (figures) were also well designed. The methodology could be easily applied in other estuaries to detect annual or seasonal TMZs changes. However, the paper could be significantly improved if English writing styles and grammar can be improved. For instance, Line 18: Recognizing and extracting estuarine turbidity maximum zone (TMZ) efficiently is important for kinds of terrestrial hydrological process. This line could be rewritten as "Recognizing and extracting estuarine turbidity maximum zone (TMZ) efficiently is important for studying terrestrial hydrological processes."*

*There are lots of English writing or expression issues. The authors should ask a native English writer for help.*

**Response:**

Dear reviewer, many thanks for the help and the comments about the English writing style and expression issues in the manuscript.

Following your suggestions, we have asked for native English writers (a professor of Florida State University and an associated professor of National University of Singapore) helping us to pick up grammatical errors and revise the text very carefully. Besides, we also asked the professional English language services, **Editage** ([www.editage.cn](http://www.editage.cn)), to further polish the English writing and grammar.

All the revising have been marked in red in the current version (lines 17-20, 27-30, 34-38, 42-46, 53-57, 64-69, 75-92, 94, 113-115, 123-124, 126-128, 135-136, 139-141, 146-156, 169-175, 187-196, 200-201, 206-208, 215-217, 220-222, 228-232, 236-239, 246, 248-249, 255-256, 260-263, 268, 271-275, 277-279, 285-286, 295-297, 301-303, 306-311, 319-321, 337-338, 343, 356-358, 382-384, 387-389, 395-401, 416-417, 422-428, 436-438, 442-448).

Once again, thanks for your kindly help!

Stay healthy and best wishes,

Chongyang Wang
