# Supplementary material for: Turbidity maximum zone index: A novel model for remote extraction of turbidity maximum zone in different estuaries
Source: Copernicus journal article supplement (doi:10.5194/gmd-2020-378), 2021-05-26
Supplement: Supplementary file [file gmd-2020-378-AC4-supplement.pdf]

**Juan Antonio Añel (Chief editor):**

*We have checked the 'Code and data availability' section of your manuscript. We would like to request you some additional information about the Landsat images used in your work. A good way of doing it would be adding the Metadata files that Glovis provides when you get an image as supplementary information to your manuscript, as it includes the version of the software used to produce it, exact time, data product, etc. Another way can be storing them in an external repository that we can accept, such as Zenodo.*

**Response:**

Dear Juan Antonio Añel, thanks for your valuable comments. The more details, the more advantageous to a study, as you point out. Following your suggestion, the **unique ProductID** and the links of the metadata information have been added to illustrate the detail information about the four scans of Landsat images used in the manuscript ([Page 8, lines 149-156](#)).

In addition, the relevant contents and the manuscript have been also revised carefully following the two reviewers' comments.

The ProductID of the four scans of Landsat images and the links of the metadata information are listed as below.

LT05\_L1TP\_122044\_20041120\_20161129\_01\_T1, was captured on November 20, 2004, covering Pearl River Estuary.

LC08\_L1TP\_122044\_20151018\_20170403\_01\_T1, was captured on October 18, 2015, covering Pearl River Estuary.

LT05\_L1TP\_120044\_20080813\_20161030\_01\_T1, was captured on August 13, 2008, covering Hanjiang River Estuary.

LC08\_L1TP\_123045\_20131206\_20170428\_01\_T1, was captured on December 6, 2013, covering Moyangjiang River Estuary.

[https://www.usgs.gov/centers/eros/science/usgs-eros-archive-landsat-archives-landsat-4-5-thematic-mapper-tm-level-1-data?qt-science\\_center\\_objects=0#qt-science\\_center\\_objects](https://www.usgs.gov/centers/eros/science/usgs-eros-archive-landsat-archives-landsat-4-5-thematic-mapper-tm-level-1-data?qt-science_center_objects=0#qt-science_center_objects)

[https://www.usgs.gov/centers/eros/science/usgs-eros-archive-landsat-archives-landsat-8-oli-operational-land-imager-and?qt-science\\_center\\_objects=0#qt-science\\_center\\_objects](https://www.usgs.gov/centers/eros/science/usgs-eros-archive-landsat-archives-landsat-8-oli-operational-land-imager-and?qt-science_center_objects=0#qt-science_center_objects)

Thanks a lot for your consideration.

Stay healthy and best wishes,

Chongyang Wang
