# Supplementary material for: Turbidity maximum zone index: A novel model for remote extraction of turbidity maximum zone in different estuaries
Source: Copernicus journal article supplement (doi:10.5194/gmd-2020-378), 2021-05-26
Supplement: Supplementary file [file gmd-2020-378-AC5-supplement.pdf]

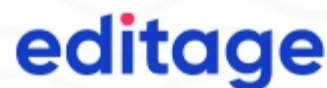

# Editing Certificate

This document certifies that the manuscript listed below has been edited to ensure language and grammar accuracy and is error free in these aspects. The edit was performed by professional editors at Editage, a division of Cactus Communications. The author's core research ideas were not altered in any way during the editing process. The quality of the edit has been guaranteed, with the assumption that our suggested changes have been accepted and the text has not been further altered without the knowledge of our editors.

## MANUSCRIPT TITLE

**Turbidity maximum zone index: A novel model for remote extraction of turbidity maximum zone in different estuaries**

## AUTHORS

**Chongyang Wang, Li Wang, Danni Wang, Dan Li, Chenghu Zhou, Hao Jiang, Qiong Zheng, Shuisen Chen, Kai Jia, Yangxiaoyue Liu, Ji Yang, Xia Zhou and Yong Li**

## ISSUED ON

**June 30, 2021**

## JOB CODE

**GYGCH\_2**

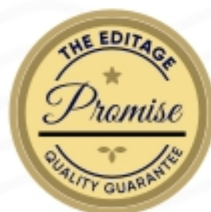

*Vikas Narang*

**Vikas Narang**  
Chief Operating Officer - Editage

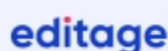

Editage, a brand of Cactus Communications, offers professional English language editing and publication support services to authors engaged in over 1300 areas of research. Through its community of experienced editors, which includes doctors, engineers, published scientists, and researchers with peer review experience, Editage has successfully helped authors get published in internationally reputed journals. Authors who work with Editage are guaranteed excellent language quality and timely delivery.

## GLOBAL :

(833) 979-0061 | [request@editage.com](mailto:request@editage.com)

## CHINA :

400-120-3020 | [fabiao@editage.cn](mailto:fabiao@editage.cn)

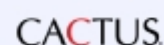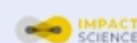

[impact.science](https://impact.science)

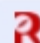

[researcher.life](https://researcher.life)

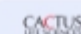

[lifesciences.cactusglobal.com](https://lifesciences.cactusglobal.com)

**Reviewer #1:**

*The paper developed an index called turbidity maximum zone index (TMZI) and defined it as the ratio of the difference and sum of logarithmic transformation of TSS (total suspended solids) concentrations and chlorophyll concentrations. Through the experiments in Pearl River Estuary (PRE), Hanjiang River Estuary (HRE) and Moyangjiang River Estuary (MRE) in Guangdong Province of China, the paper confirmed that the TMZI index ( $>0.2$ ) effectively distinguished turbidity maximum zones (TMZs) in these estuaries.*

*Moreover, the paper illustrated how to extract TSS and chlorophyll from Landsat TM and OLI images. The paper clearly explained the methodology, logically carried out the validation tests, and well presented the validation results. The graphics (figures) were also well designed. The methodology could be easily applied in other estuaries to detect annual or seasonal TMZs changes. However, the paper could be significantly improved if English writing styles and grammar can be improved. For instance, Line 18: Recognizing and extracting estuarine turbidity maximum zone (TMZ) efficiently is important for kinds of terrestrial hydrological process. This line could be rewritten as "Recognizing and extracting estuarine turbidity maximum zone (TMZ) efficiently is important for studying terrestrial hydrological processes."*

*There are lots of English writing or expression issues. The authors should ask a native English writer for help.*

**Response:**

Dear reviewer, many thanks for the help and the comments about the English writing style and expression issues in the manuscript.

Following your suggestions, we have asked for native English writers (a professor of Florida State University and an associated professor of National University of Singapore) helping us to pick up grammatical errors and revise the text very carefully. Besides, we also asked the professional English language services, **Editage** ([www.editage.cn](http://www.editage.cn)), to further polish the English writing and grammar.

All the revising have been marked in red in the current version(lines 17-20, 27-30, 34-38, 42-46, 53-57, 64-69, 75-92, 94, 113-115, 123-124, 126-128, 135-136, 139-141, 146-156, 169-175, 187-196, 200-201, 206-208, 215-217, 220-222, 228-232, 236-239, 246, 248-249, 255-256, 260-263, 268, 271-275, 277-279, 285-286, 295-297, 301-303, 306-311, 319-321, 337-338, 343, 356-358, 382-384, 387-389, 395-401, 416-417, 422-428, 436-438, 442-448).

Once again, thanks for your kindly help!

Stay healthy and best wishes,

Chongyang Wang

# Turbidity maximum zone index: A novel model for remote extraction of turbidity maximum zone in different estuaries

Chongyang Wang<sup>1‡</sup>, Li Wang<sup>1‡</sup>, Danni Wang<sup>2</sup>, Dan Li<sup>1,3</sup>, Chenghu Zhou<sup>1,3,4</sup>, Hao Jiang<sup>1,3</sup>, Qiong Zheng<sup>1</sup>, Shuisen Chen<sup>1</sup>, Kai Jia<sup>1</sup>, Yangxiaoyue Liu<sup>1,3</sup>, Ji Yang<sup>1,3</sup>, Xia Zhou<sup>1</sup> and Yong Li<sup>1,3</sup>

<sup>1</sup> Guangdong Open Laboratory of Geospatial Information Technology and Application, Key Lab of Guangdong for Utilization of Remote Sensing and Geographical Information System, Guangzhou Institute of Geography, Guangdong Academy of Sciences, Guangzhou 510070, China

<sup>2</sup> Guangzhou Xinhua University, Guangzhou 510520, China

<sup>3</sup> Southern Marine Science and Engineering Guangdong Laboratory (Guangzhou), Guangzhou 511458, China

<sup>4</sup> State Key Laboratory of Resources and Environmental Information System, Institute of Geographic Sciences and Natural Resources Research, Chinese Academy of Sciences, Beijing 100101, China

‡ Equally contributed to this work

**Correspondence:** Dan Li (lidan@gdas.ac.cn); Chenghu Zhou (zhouch@lreis.ac.cn)

**Abstract.** An efficient recognition and extraction of the estuarine turbidity maximum zone (TMZ) is important for studying terrestrial hydrological processes. Although many studies relevant to TMZ have been conducted worldwide, the extraction methods and criteria used to describe TMZ vary significantly both spatially and temporally. To improve the applicability of the methods adopted in previous studies and to develop a

novel model to accurately extract TMZ in multiple estuaries and different seasons from remote sensing imageries, this study estimated the total suspended solids (TSS) and chlorophyll a (Chla) concentrations in three estuaries. These were the Pearl River Estuary (PRE), the Hanjiang River Estuary (HRE), and the Moyangjiang River Estuary (MRE) of Guangdong Province, China. The spatial distribution characteristics of the TSS and Chla concentrations were analyzed. A nearly opposite association was found between the TSS and Chla concentrations in the three estuaries, particularly in the PRE. The regions with high (low) TSS concentrations had relatively low (high) Chla concentrations and therefore, a turbidity maximum zone index (TMZI), defined as the ratio of the difference and sum of the logarithmic transformation of the TSS and Chla concentrations, was firstly proposed. By calculating the TMZI values in the PRE on November 20, 2004 (low-flow season), it was found that the criterion ( $TMZI > 0.2$ ) could be used to identify the TMZs of the PRE effectively. The TMZ extraction results were generally consistent with the visual interpretation results. The area-based accuracy measures showed that the quality (Q) of the extraction reached 0.8429. The same criterion was applied in the PRE on October 18, 2015 (high-flow season), and high accuracy and consistency across seasons were observed ( $Q = 0.8171$ ). The western shoal of the PRE was the main distribution area of TMZs. Extracting TMZs by the newly proposed index performed well in different estuaries and on different dates (HRE on August 13, 2008 in the high-flow season and MRE on December 6, 2013 in the low-flow season). Compared to the previous fixed threshold of TSS or turbidity methods,

extracting TMZ using TMZI had higher accuracy and better applicability (Q: 0.1046–0.4770 vs. 0.8171–0.8429). Evidently, this unified TMZI is potentially an optimized method for the global monitoring and extraction of TMZs of estuaries from different satellite remote sensing imageries. It can be used to help the understanding of the spatial and temporal variation of TMZs and estuarine processes at regional and global scales, as well as improve the management and sustainable development of regional society and the natural environment.

Keywords: turbidity maximum zone; turbidity maximum zone index; total suspended solid; chlorophyll a; remote sensing; estuary

## 1 Introduction

The turbidity maximum zone (TMZ) is the dynamic turbid water area within an estuary, where the suspended solid concentrations, namely, sediment and matter, are consistently and significantly higher than landward and seaward (Shen, 1995; Gebhardt et al., 2005; Yu et al., 2014; Li et al., 2019). It is a special phenomenon of suspended sediment movement and migration in estuaries worldwide (Schubel, 1968; Shi et al., 1993; Mitchell et al., 2012; Wang et al., 2021). The spatial distributions and dynamic changes of TMZs not only have a deep and wide impact on the formation and development of estuary morphology, channels, shoals, and sandbars (Asp et al., 2018; Azhikodan and Yokoyama, 2019; Li et al., 2019), but also significantly affect the physics and geochemical and biogeochemical processes of natural estuarine

environments, as well as social production activities (Gebhardt et al., 2005; Jalón-Rojas et al., 2016; Kitheka et al., 2016; Toubanc et al., 2016; Yan et al., 2020). TMZ has long been a popular area for scientific study and engineering innovations among researchers, government agencies, engineering corporations, and communities (Shen et al., 2001; Shi et al., 2017; Jiang et al., 2019; Wang et al. 2021).

Previous studies have examined TMZ from various aspects based on different data resources and methods, such as the characteristics and dynamics of total suspended solids (TSS) concentrations in TMZ (Yang et al., 2014; Wan and Wang, 2017; Grasso et al., 2018), the mechanisms and formation of TMZ (Brenon and Hir, 1999; Wai et al., 2004; Yu et al., 2014; Toubanc et al., 2016), the location, distribution, and change of TMZ across time (Jiang et al., 2013; Jalón-Rojas et al., 2016; Li et al., 2019; Yan et al., 2020), the interaction with other factors, and its long-term trend (Gebhardt et al., 2005; Chen et al., 2016; Li et al., 2019). The location of TMZ in an estuary is a fundamental question and an important aspect of studying TMZ. It was found that there were two major ways to obtain the locations and distributions of TMZs (Wang et al., 2021). One was a relatively approximate description, such as TMZ locations corresponding to the front of the salinity wedge and moving range of stagnation points, or a distance from coastlines (Feng et al., 2002; Mitchell, 2013; Kitheka et al., 2016; Liu et al., 2016; Toubanc et al., 2016; Gong et al., 2017; Zhang et al., 2019; Yan et al., 2020). The other was a relatively quantitative result. The thresholds of TSS concentrations or turbidity criteria were used to extract the distribution of TMZs (Jiang et al., 2013; Yang and Liu,

2015; Chen et al., 2016; Jalón-Rojas et al., 2016; Shi et al., 2017; Li et al., 2019).

However, the fixed threshold method has potential drawbacks. It is a challenging task to precisely generate TMZ extraction results at different times using a fixed threshold of TSS concentration because TSS concentrations showed significant variations in different seasons. Moreover, the threshold values are difficult to transfer from local regions to other regions because research and a scientific basis are lacking. The threshold method and criteria vary significantly in different estuaries, in different regions of the same estuary, in the same estuary at different times, and by different studies, demonstrating considerable subjectivity. The results were not comparable (Wang et al., 2021).

TSS concentrations in the TMZs and adjacent waters vary significantly (Uncles et al., 2000; Park et al., 2008; Mitchell, 2013; Wang et al., 2018). Many studies have shown that suspended solids can affect the growth of chlorophyll a (Chla) through absorption and sunlight scattering in water (Pozdnyakov et al., 2005; Chen et al., 2015; Montanher et al., 2014; Wang et al., 2017a; Wang et al., 2020b). Therefore, it was concluded that there is a relationship between TSS concentrations and Chla concentrations and different characteristics in TMZ and normal water bodies in estuaries. This relationship might be used to overcome the drawbacks of previous methods of extracting TMZ and distinguish and recognize TMZ effectively.

Based on this analysis, the objectives of this study are to propose a new model with better adaptability and robustness for distinguishing and extracting TMZ in

different estuaries and in different seasons. To achieve this goal, the TSS and Chla concentrations in the Pearl River Estuary (PRE), Hanjiang River Estuary (HRE), and Moyangjiang River Estuary (MRE) were first estimated. The different spatial characteristics were analyzed and compared. Subsequently, the corresponding relationship and special features of TSS and Chla concentrations were used to develop a turbidity maximum zone index (TMZI). Finally, the TMZs in these estuaries were extracted at different times by the model (TMZI) and validated and assessed for accuracy.

The remainder of this paper is organized as follows. The study areas, in situ data, satellite imagery, TSS concentration data, Chla retrieval model, and its calibration and validation are described in Section 2, as well as the TMZ extraction accuracy assessment measures. The spatial analysis of TSS concentration, Chla concentration, and the corresponding relationship between them are presented in Section 3.1. The establishment of TMZI and its application and assessment in different estuaries and at different times are shown in Sections 3.2-3.5. The summary and conclusions are presented in Section 4.

## 2 Dataset and methods

### 2.1 Study areas

The study areas include the Pearl, Hanjiang, and Moyangjiang River Estuaries of Guangdong Province, South China (Figs. 1, 4, and 7-10). The PRE (horn-shaped) is



located between longitudes 113.45 °114.2 °E and latitudes 22.25 °22.85 °N, mainly in the core zone of Guangdong-Hong Kong-Macao Greater Bay Area. The HRE (forking-shaped) is located between longitudes 116.6 °117 °E and latitudes 23.2 °23.6 °N, mainly in Shantou city, Eastern Guangdong Province. The MRE (calabash-shaped) is located between longitudes 111.9 °112.3 °E and latitudes 21.66 °21.8 °N, mainly in Yangjiang city, Western Guangdong Province.

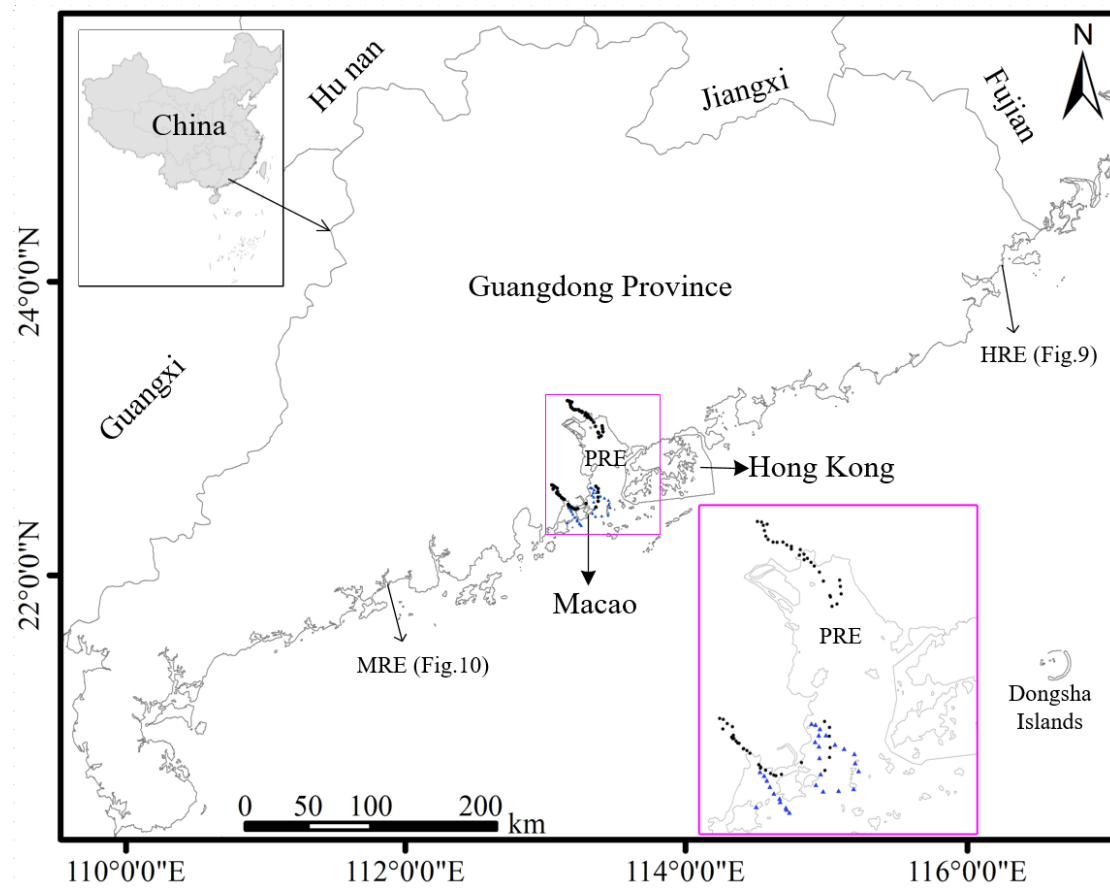

**Fig. 1.** Study areas (PRE, HRE, and MRE) and the locations of the in-situ data indicated by black dots and blue triangles.

The Pearl River has the second largest annual runoff and is the third largest river in China. The Hanjiang and Moyangjiang Rivers are the second and third largest rivers in Guangdong Province (Chen et al., 2011; Wang et al., 2018; Wang et al., 2020a).

Previous studies have reported that the sediment loads of the Pearl, Hanjing and Moyangjiang Rivers were  $7.53 \cdot 10^7$ ,  $6.93 \cdot 10^6$  and  $3.27 \cdot 10^5$  ton per year, respectively (Wang et al., 2017a, b; Wang et al., 2020a). It was found that the three rivers and estuaries have different characteristics, and much associated research has been conducted in these regions for a long time.

## 2.2 In-situ and satellite data

The 89 in-situ samples, including water surface reflectance and Chla concentrations, were collected from the PRE (Fig. 1, Table 1). Sixty of these samples were also used in a previous study by the current authors (black dots) (Chen et al., 2011). The present study included 29 new samples (blue triangles). Here, these samples were used to recalibrate and validate a Landsat-based Chla concentration retrieval model.

In addition, four scenes of good quality Landsat imageries were used. Two images from TM and OLI (path/row = 122/44) were captured on November 20, 2004 (ProductID: LT05\_L1TP\_122044\_20041120\_20161129\_01\_T1), and October 18, 2015 (LC08\_L1TP\_122044\_20151018\_20170403\_01\_T1), respectively, covering the PRE (Figs. 7a and 8c). The image from TM (path/row = 120/44) was captured on August 13, 2008 (LT05\_L1TP\_120044\_20080813\_20161030\_01\_T1), covering the HRE (Fig. 9c). The final image from OLI (path/row = 123/45), was captured on December 6, 2013 (LC08\_L1TP\_123045\_20131206\_20170428\_01\_T1), covering the MRE (Fig. 10c).

**Table 1**

The 89 in-situ data.

| Date         | Samples | Measurements      |                                    |
|--------------|---------|-------------------|------------------------------------|
| Dec 9, 2006  | 16      | Reflectance, Chla |                                    |
| Dec 21, 2006 | 12      | Reflectance, Chla | Same as                            |
| Dec 27, 2007 | 15      | Reflectance, Chla | <a href="#">Chen et al. (2011)</a> |
| Dec 31, 2007 | 17      | Reflectance, Chla |                                    |
| Nov 2, 2012  | 18      | Reflectance, Chla | Newly added                        |
| Sep 10, 2013 | 11      | Reflectance, Chla |                                    |

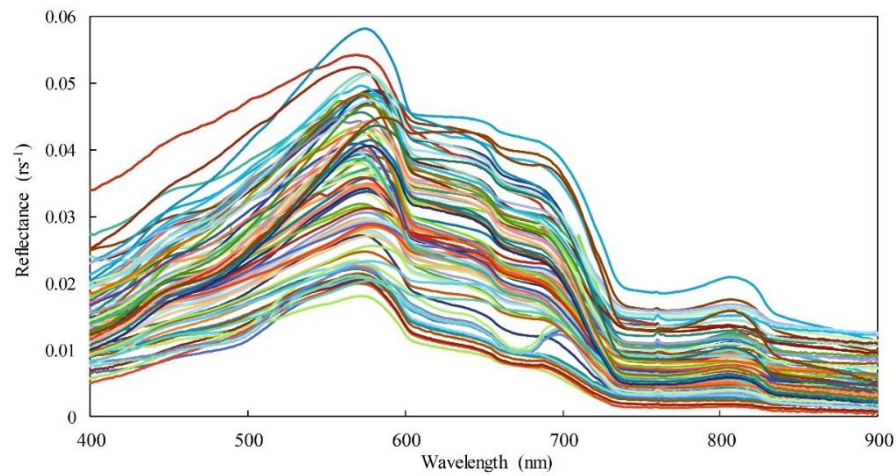

**Fig. 2.** Remote sensing reflectance of surface water of the 89 in situ data.

### 2.3 Total suspended solids data and chlorophyll a data

The aim of this study was to establish and develop a new model (TMZI) based on TSS concentrations and Chla concentrations, and further extract TMZs in three

estuaries of Guangdong Province. Therefore, the TSS and Chla concentrations in the study areas were first calculated. The TSS concentration data were obtained from previous work of the current authors (Wang et al., 2017a, b; Wang et al., 2018; Wang et al., 2020a). The corresponding Chla data required retrieval using Landsat imagery. Consequently, a Landsat-based Chla concentration retrieval model was expected to be suitable for different estuaries. Many models have been developed to estimate Chla concentration from different remote sensing data (Gregg and Casey, 2004; Chen et al., 2011; Kim et al., 2016a, b; Attila et al., 2018). Following the features and forms of some typical chlorophyll a retrieval models (Le et al., 2009; Chen et al., 2011; Le et al., 2013; Song et al., 2013), a three-band Landsat-based chlorophyll a model using the 89 in-situ samples was recalibrated and validated (Fig. 3; Equation 1). The model, based on Landsat TM and OLI sensors, explained approximately 80% of the Chla concentration variation (Chla: 1.92-92.6 mg/m<sup>3</sup>, N=60, P-value<0.01) and had an acceptable validation accuracy (Chla: 2.33-36.8 mg/m<sup>3</sup>, RMSE≤3.76 mg/m<sup>3</sup>, N=29).

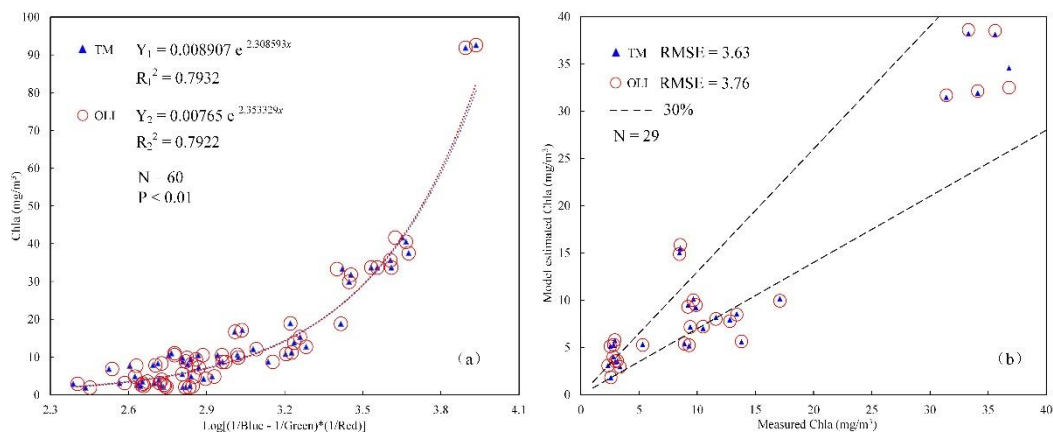

**Fig. 3.** The calibration (a) and validation (b) results of the Chla retrieval models based on 89 in situ data for Landsat sensors.

$$Chla = a * e^{b * \log_{10}[(\frac{1}{R_1} - \frac{1}{R_2}) * \frac{1}{R_3}]} \quad (1)$$

where  $R_1$ ,  $R_2$  and  $R_3$  represent the blue, green, and red band of the TM and OLI sensors, respectively. The parameters  $a$  and  $b$  corresponding to the TM and OLI sensors are 0.008907, 2.308593 and 0.00765, 2.353329, respectively. The unit of chlorophyll  $a$  concentration is in  $\text{mg}/\text{m}^3$ .

## 2.4 Accuracy assessment measures

To evaluate TMZI extraction accuracy and compare the performances of the different methods, the common accuracy measures of object recognition in remote sensing, area-based accuracy measures (Cai et al., 2018), was used.

Suppose that  $A_E$  is the area of the extracted TMZ,  $A_C$  is the correct part of  $A_E$ , and  $A_R$  is the reference TMZ. Then the quality ( $Q$ ) of the TMZ extraction results in the study could be defined as follows (equation 2).

$$Q = \frac{A_C}{A_E + A_R - A_C} \quad (2)$$

The range of  $Q$  is 0 to 1. The bigger the  $Q$  value, the higher the accuracy of the TMZ extraction results, and the better performance of the method.

## 3 Results and discussion

### 3.1 The spatial characteristics of TSS and Chla concentrations in estuaries

Chla concentrations in each estuary were estimated using the Chla concentration retrieval model that was developed (Fig. 3). The different spatial distribution characteristics of the TSS and Chla concentrations were analyzed. Taking the PRE as

an example, TSS concentrations in the low-flow season of the PRE (November 20, 2004) have a large variation ranging from 1.37 mg/L to more than 200 mg/L (Fig. 4a). Due to the strong interaction between runoff and tide, the main region of high TSS concentrations is in the west shoal of the PRE (Wang et al., 2018), where concentrations of more than 100 mg/L were frequently found. In addition, TSS concentrations in parts of the east shoal and Neilingding island adjacent waters were also relatively higher. The other areas of the PRE have low TSS concentrations, where the maximum value is generally not more than 40 mg/L, particularly in the Hong Kong coastal water bodies (Fig. 4a).

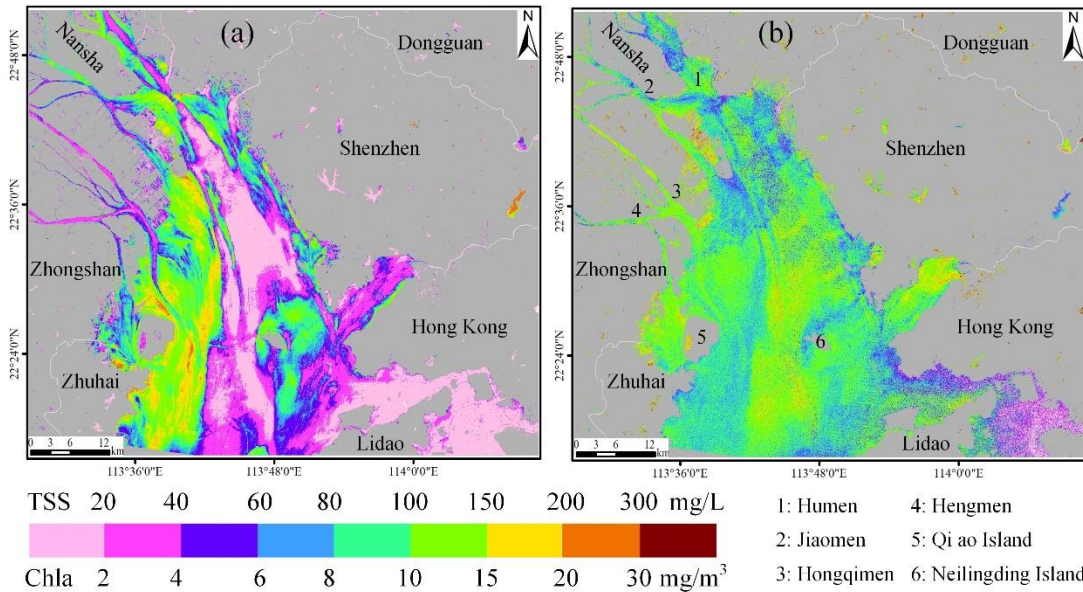

**Fig. 4.** The estimated TSS concentrations (a) and Chla concentrations (b) in the PRE on November 20, 2004.

In contrast to the TSS concentration results, the Chla concentrations in the PRE have significantly lower values of less than 20 mg/m<sup>3</sup> in almost the entire PRE (Fig. 4b). The results concord with the findings of Liu et al. (2017) and Huang et al. (2005),

who found that Chla concentrations ranged from 0.24 mg/m<sup>3</sup> to 21.5 mg/m<sup>3</sup> in the PRE at different times. Furthermore, Chla concentrations in the PRE show almost opposite spatial characteristics to TSS concentrations. Apart from the eastern Lidao district coastal water bodies, the regions of relatively high (low) Chla concentrations are the regions of relatively low (high) TSS concentrations. These corresponding features are apparent in the four waterways, namely, Humen, Jiaomen, Hongqimen, and Hengmen waterways and the shoals, and channels of the PRE (Fig. 4).

To further analyze and assess the corresponding relationship between TSS and Chla concentrations in the estuaries, three rows of TSS and Chla concentration values in the PRE were extracted (Fig. 7a; pink lines; rows 1200, 1600, and 1900, columns from 800 to 1300). The results for row 1600 are shown in Fig. 5(a). A correlation analysis showed a significant negative correlation between TSS and Chla concentrations. For the original TSS and Chla concentrations, the correlation coefficient was -0.6531. The correlation coefficient reaches approximately -0.9 for its trend lines (Fig. 5a).

### 3.2 Establishment and application of TMZI

Based on the analysis and corresponding features between TSS and Chla concentrations, it is considered that the transform results derived from the two water color elements may help to better distinguish and extract TMZ. In this study, TMZI was defined as the ratio of the difference and sum of logarithmic transformation of TSS



concentrations and Chla concentrations (equation 3), which is similar to the normalized difference vegetation index (NDVI).

$$TMZI = [\text{Log}(TSS) - \text{Log}(Chla)] / [\text{Log}(TSS) + \text{Log}(Chla)] \quad (3)$$

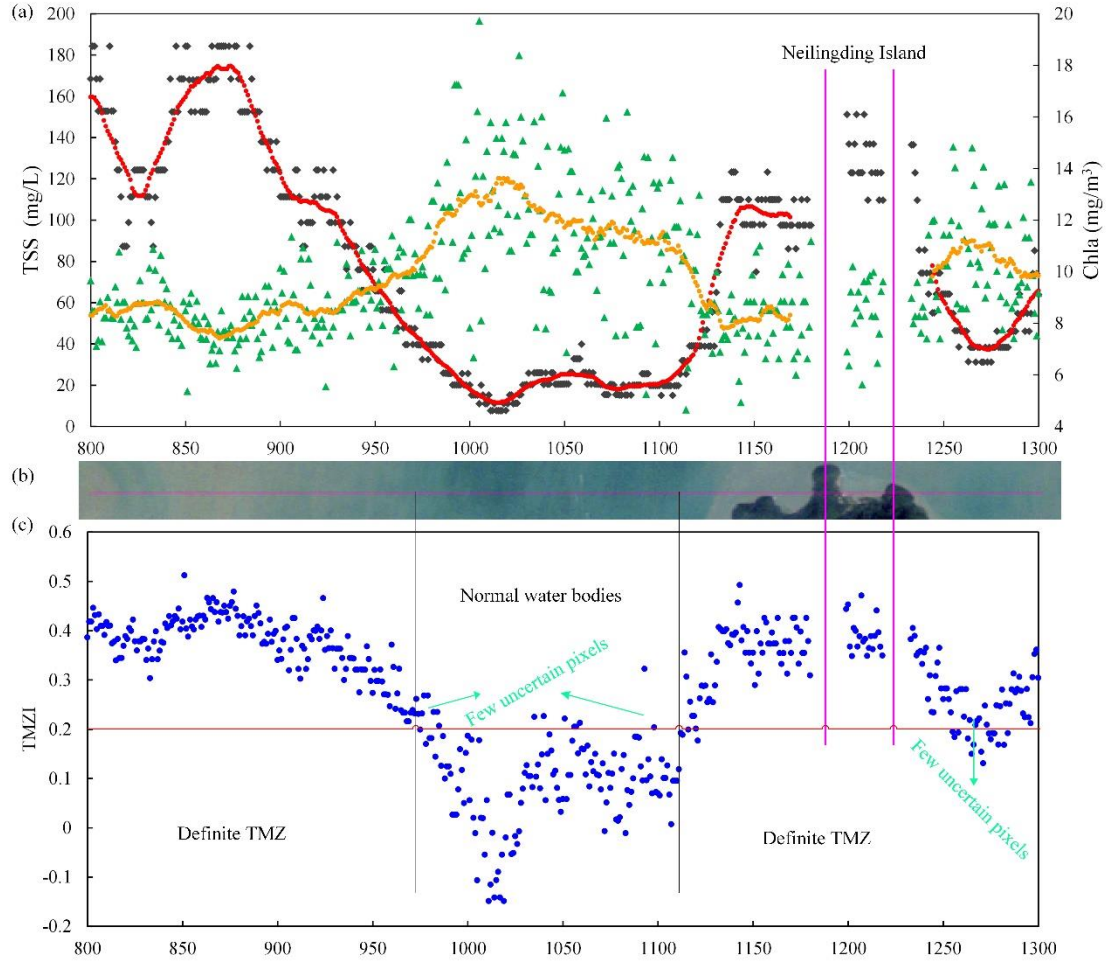

**Fig. 5.** The corresponding spatial relationship between the TSS concentrations, indicated by black dots and red trend line, and Chla concentrations, indicated by green triangles and orange trend line of row 1600 (a), the true color imagery (b) and the corresponding values of TMZI (c).

According to the definition and equation, this study calculated TMZI values (Figs. 5c, 6b and d). Taking the results of row 1600 as an example (Fig. 5b and c), the row pixels can be mainly divided into one TMZ (columns 800-975), normal water bodies (columns 975-1110), and another TMZ (columns 1110-1300) from left to right. The null



values located in columns 1180-1200 and 1220-1235 are Neilingding Island (Figs. 5 and 7a). Through a comparison with the results of TMZI, it is found that all the values of TMZI corresponding to TMZ pixels are larger than 0.2, while the values corresponding to normal water body pixels are all smaller than 0.2, except for a few blurry pixels (Figs. 5b and c). For the results of rows 1200 and 1900, similar corresponding characteristics between TMZ and TMZI and the same criterion were also found (Fig. 6). Therefore, TMZI showed a significant feature and had the potential to develop into a better model for recognizing and extracting estuarine TMZ.

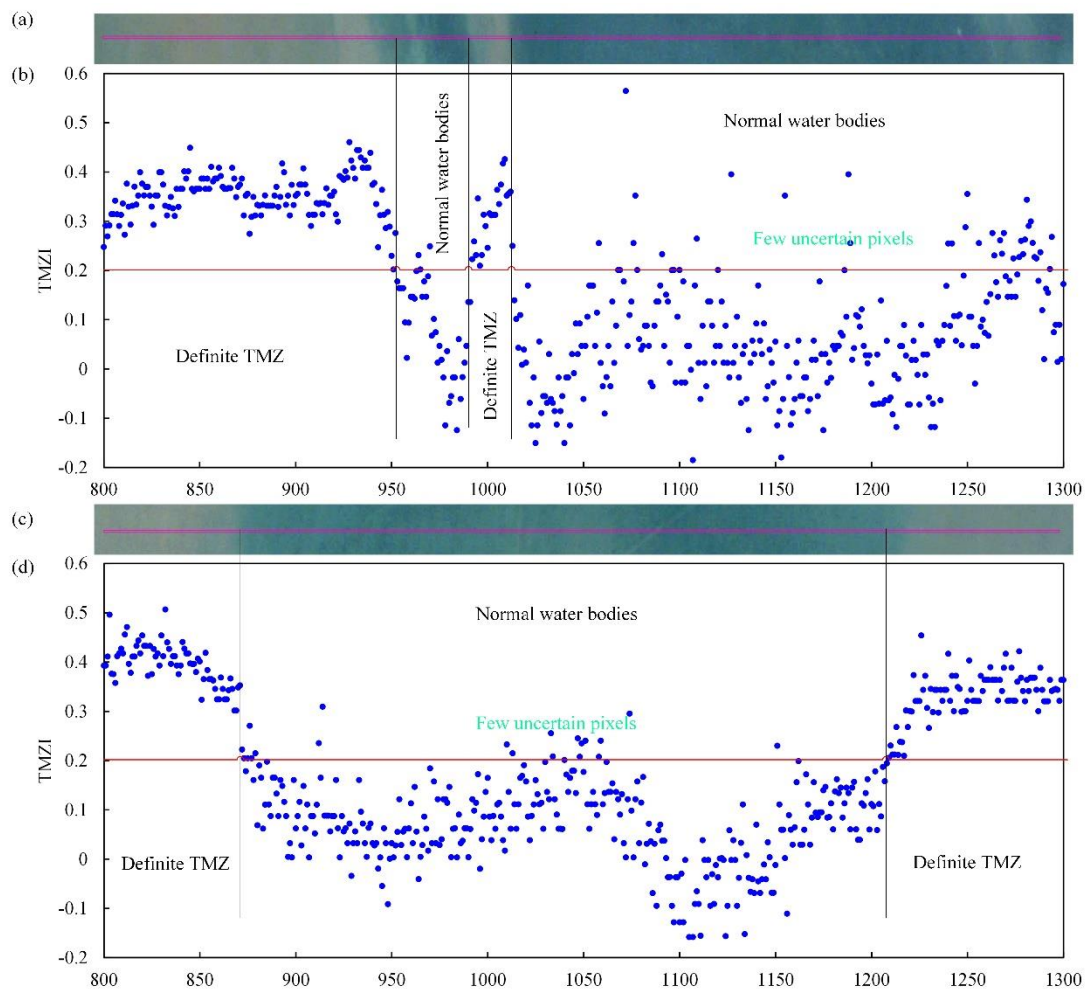

**Fig. 6.** The true color imagery and the corresponding values of TMZI of rows 1200 (a and b) and 1900 (c and d).

The TMZI of the entire Landsat TM imagery was subsequently calculated, and TMZs in the PRE were extracted. Fig. 7(b) shows the spatial distribution results of TMZ in the PRE on November 20, 2004. TMZ is widely distributed throughout the PRE, accounting for more than half of the water areas in the imagery. Among them, the main TMZ is located within an average distance of 11 km from the Panyu, Nansha, Zhongshang, and Zhuhai coasts, which approximately corresponds to the west shoal in the PRE. In the western Dongguan and Shenzhen coastal water bodies, an approximately rectangular TMZ develops approximately 5 km from the coastline, which indicates the location of the east shoal of the PRE (Wang et al., 2018). In addition, a third main TMZ in the PRE located from surrounding Neilingding Island to western Hong Kong water bodies is found, although TSS concentrations in TMZ are lower than those of the former TMZs (Figs.4a and 7b). Compared to the visual interpretation of TMZ results in previous works by the current authors (Fig.7 a) (Wang et al., 2020b, 2021), the area-based accuracy measures show that the quality of extraction achieves 0.8429. The good TMZ extraction results and the high validation accuracy by TMZI in this study indicate a more effective way to recognize TMZs in estuaries (Figs. 6-7).

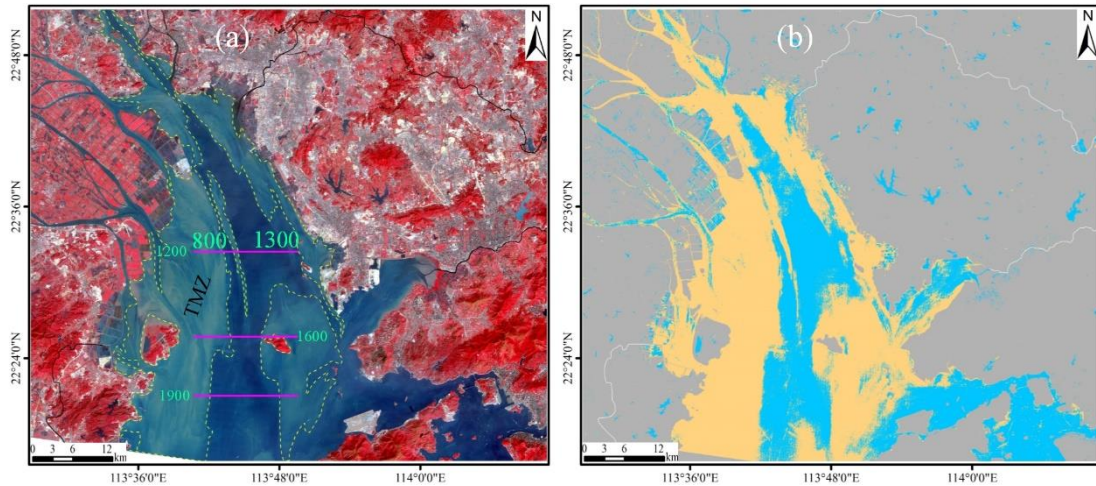

**Fig. 7.** False color imagery (USGS 1982; NASA 2001) and the visual interpretation TMZ results (regions indicated by yellow dashed frames) (Wang et al., 2020b, 2021) (a), and the extracted TMZ results, indicated by mango colors (b) in the PRE on November 20, 2004 (low-flow season).

### 3.3 Validation of the accuracy of TMZI in different seasons

Due to the complexity of hydrodynamic environments, the estuarine factors and water color elements show significant variations in different seasons, even in the same estuary at different times of the day. Therefore, this study further validated the accuracy of TMZI for extracting TMZ in the PRE during the high-flow season (October 18, 2015).

Fig. 8(a) and (b) demonstrate the retrieved TSS and Chla concentration results in the high-flow season of PRE. The results in different seasons are significantly different (Figs. 4 and 8). On October 18, 2015, TSS concentrations in the PRE had wider variables, ranging from 2.23 to 286.6 mg/L. However, the water bodies with high TSS concentrations (more than 80 mg/L) were mainly in the outlets of four waterways, namely, the Humen, Jiaomen, Hongqimen, and Hengmen waterways. The other regions

291 of the PRE have significantly lower TSS concentrations of generally less than 20 mg/L  
 292 (Fig. 8a). Similar to the corresponding features between TSS and Chla concentrations  
 293 in the low-flow season, the almost opposite spatial characteristics remain in the high-  
 294 flow season. For regions with relatively high (low) Chla concentrations there are  
 295 relatively low (high) TSS concentrations (Figs. 8a and b). **Notably, the eastern Lidao**  
 296 **district coastal water bodies are an exception, with the same results in the low-flow**  
 297 **season (Fig. 4). Both TSS and Chla concentrations in the zone are relatively low (Figs.**  
 298 **4 and 8).**

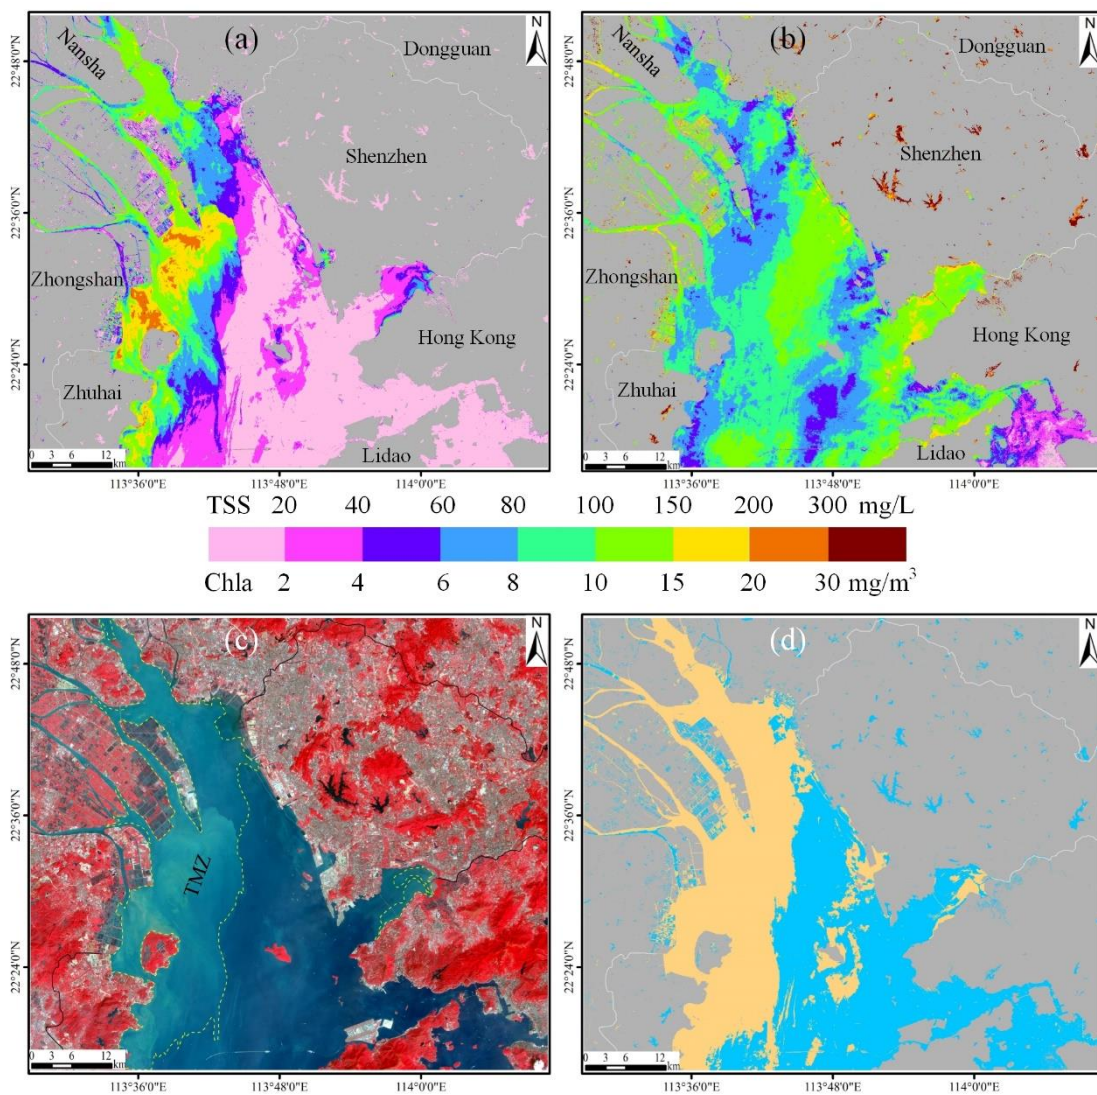



**Fig. 8.** The estimated TSS concentrations (a), Chla concentrations (b), false color imagery (USGS 1982; NASA 2001), and the visual interpretation TMZ results (regions indicated by yellow dashed frames) (Wang et al., 2020b) (c), and extracted TMZ results, indicated by mango colors (d) in the PRE on October 18, 2015 (high-flow season).

Using the results of TSS and Chla concentrations of the PRE on October 18, 2015, the TMZI was calculated and TMZs of the PRE were extracted in the high-flow season (Fig. 8d). Compared with the visual interpretation TMZ results (Fig.8 c) (Wang et al., 2020b), the area-based accuracy measures show that the quality of extraction is 0.8171. It is also indicated that an acceptable accuracy is obtained by TMZI in the high-flow season of the PRE. In addition, only one main TMZ remains along the west coast of the PRE (Fig. 8d), which is similar to one of the main TMZs in the low-flow season of 2004 (Fig. 7b). However, clear differences remain in different seasons, such as TMZs in the Hongqimen and Hengmen waterways and the eastern Zhuhai coasts (Figs. 7b and 8d). The other TMZs in the high-flow season of 2015 are mainly located in the surrounding Dachanwan Wharf of Shenzhen and Neilingding Island. The distributions are less apparent than those in the low-flow season of 2004 (Fig. 7b). Besides, two relatively small isolated TMZs can be found on the two artificial islands of the Hong Kong-Zhuhai-Macao Bridge (Fig. 8d), which may imply the associated influence of human activities.

According to the analysis of the PRE results on October 18, 2015, it is demonstrated that the TMZI and the criterion ( $TMZI > 0.2$ ) also perform well in extracting estuarine TMZ in different seasons using Landsat OLI imagery.

### 3.4 Assessment of the applicability of TMZI in different estuaries

To further assess the applicability of TMZI in different estuaries, as for the PRE, the corresponding TMZ results in the HRE and the MRE were also calculated and validated.

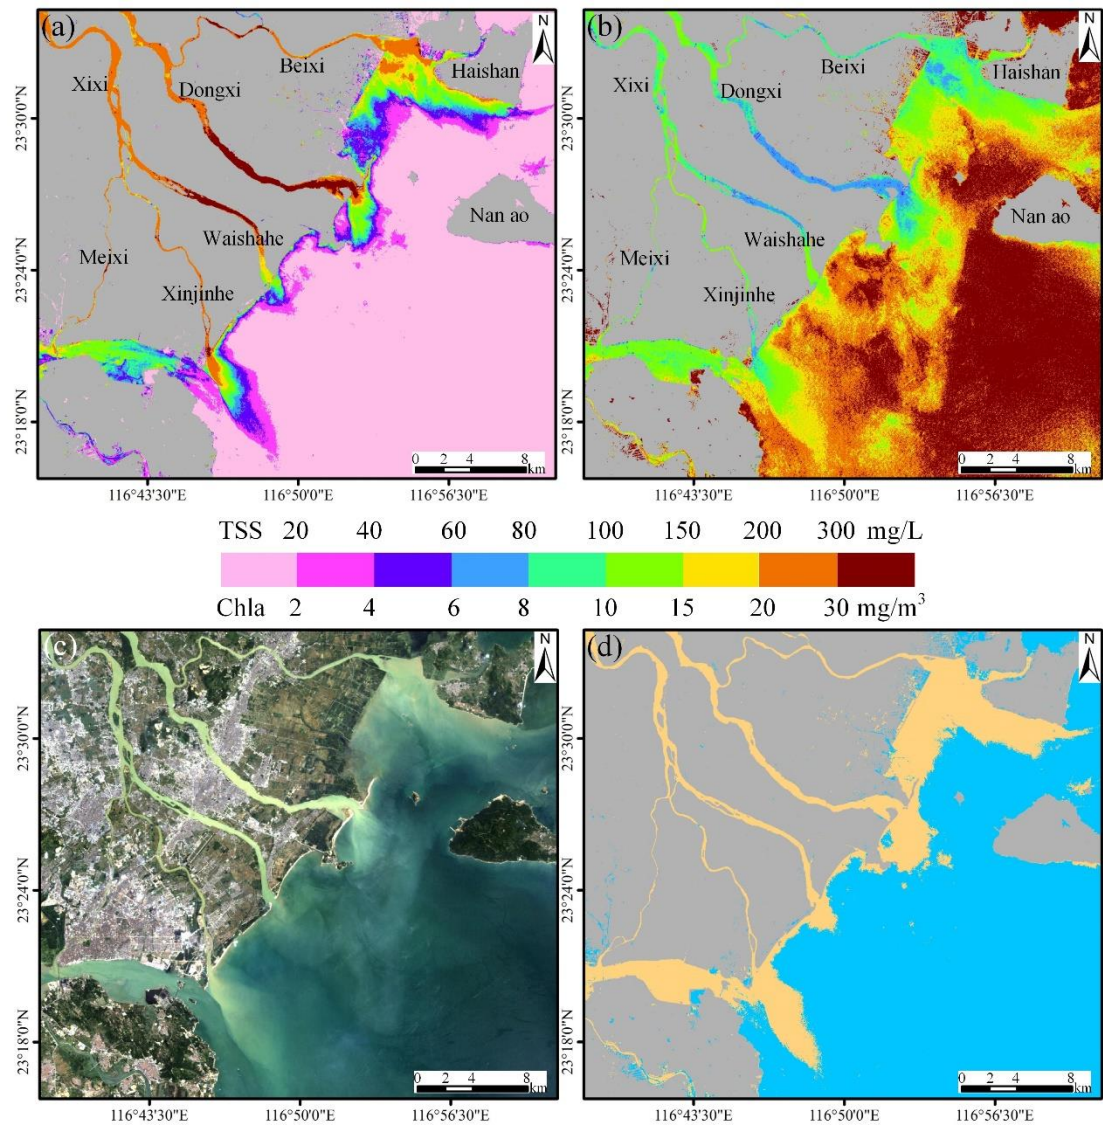

**Fig. 9.** The estimated TSS concentrations (a), Chla concentrations (b), true color imagery (USGS 1982; NASA 2001) (c), and extracted TMZ results, indicated by mango colors (d) in the HRE on August 13, 2008 (high-flow season).

Fig. 9 (a) and (b) indicate the results of TSS and Chla concentrations in the HRE on August 13, 2008. The TSS concentrations downstream and in the estuary of the HRE are significantly higher than the outer shelf area, particularly in the downstream of the Dongxi River and Xinjinhe River waterways of the Hanjiang River, with a mean value in excess of 300 mg/L (Fig. 9a). TSS concentrations in the offshore area (South China Sea) are frequently less than 20 mg/L. Therefore, a significant decreasing trend of TSS concentration is found from the northwest to southeast in the HRE (Fig. 9a). Furthermore, the Chla concentrations in the HRE show opposite spatial distributions characteristics, which resembles the findings in the PRE (Figs. 4 and 8). Relatively low Chla concentrations are mainly generally found in the downstream and estuary, and the outer shelf area has high values (Fig. 9b). The Chla concentrations in the HRE range from 4.1 to 37.3 mg/m<sup>3</sup> (Fig. 9b), which is slightly higher than that of the PRE (Figs. 4 and 8).

The TMZ extraction results for the HRE are shown in Fig. 9(d). The TMZs are distributed in all the downstream and estuaries of the Hangjiang River. They can be divided into four main TMZs based on different waterways, namely, the Beixi, Dongxi, Waishahe, Xinjinhe, and Meixi waterways of the Hanjing River. The maximum TMZ is located within an average distance of 3 km from the Beixi estuary, western Haishan

coast, and the coastlines between the Beixi and Dongxi estuaries. The second largest TMZ of the HRE is distributed from the Meixi to the Xinjinhe estuaries. The region of the main TMZ of the Xinjinhe estuary appears knife-shaped, which is mainly caused by the runoff of the Xinjinhe waterway and the flow guiding line connected to Longhu District, Shantou City (Fig. 9 d) (Wang et al., 2017a). The other two relatively smaller TMZs are distributed in the Dongxi and Waishahe estuaries, respectively. The results indicate that the TMZ distribution in the HRE is mainly related to tide, runoff, estuarine topography, and human activity.

In the MRE, the region of high TSS concentrations is mainly distributed at an average distance of 1.2 km from the Yangjiang coastlines, particularly in the eastern Hailingdati dike water bodies, with a mean value of more than 150 mg/L (Fig. 10a). The outer shelf area has significantly lower TSS concentrations of generally less than 35 mg/L. The Chla concentrations in most regions of the MRE are more than 4 mg/m<sup>3</sup>, except for the southwestern Dongping town coastal water bodies, where Chla concentrations mainly range from 2 to 4 mg/m<sup>3</sup>. The Chla concentrations in the Moyangjiang River downstream, Fuchang town coast, and outside of the Shouchanghe River estuary have relatively high values of frequently greater than 8 mg/m<sup>3</sup> (Fig. 10b). Compared to the PRE and the HRE, the corresponding relationship between TSS and Chla concentrations in the MRE is slightly weak. However, a trend of high (low) TSS concentrations in water bodies with relatively low (high) Chla concentrations remains (Figs. 10a and b).



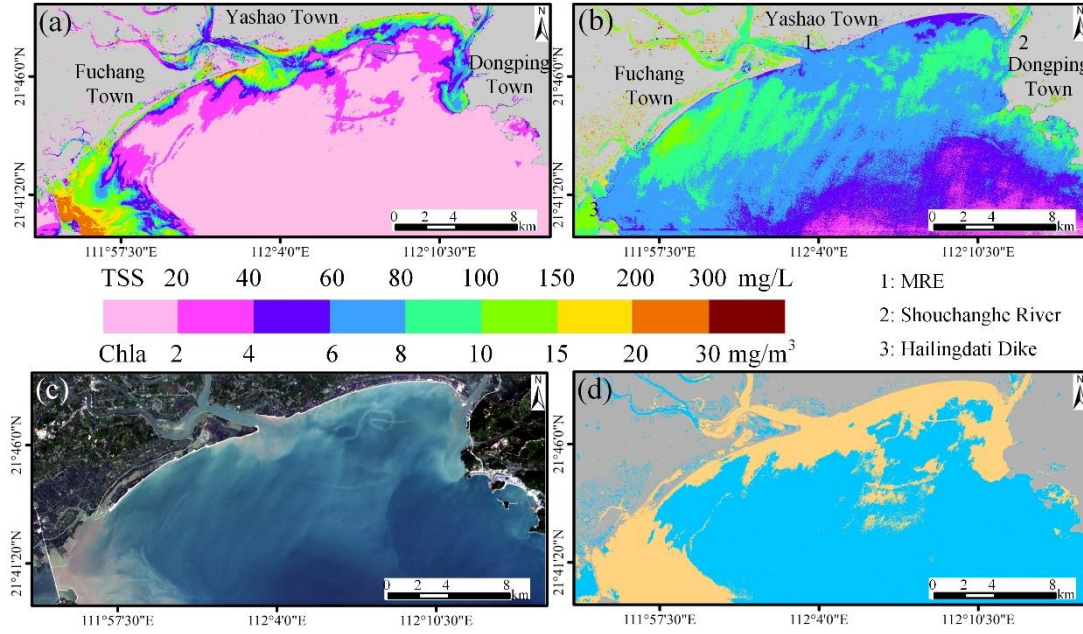

**Fig. 10.** The estimated TSS concentrations (a), Chla concentrations (b), true color imagery (USGS 1982; NASA 2001) (c), and extracted TMZ results, indicated by mango colors (d) in the MRE on December 6, 2013 (Low-flow season).

Figs. 10 (c) and (d) indicate the true color imagery of the MRE and the TMZs extraction results. There are two main TMZs in the MRE on December 6, 2013. The first TMZ is mainly distributed from the inside and outside of the Moyangjiang River estuary to the Shouchanghe River estuary, with a distance of approximately 1.8 km from the coastlines (Fig. 10d). The distribution of TMZ in this region is mainly attributed to the interaction of tide and runoff. Another main TMZ is in the regions 4 km from the Hailingdati dike, and is mainly caused by obstruction against ocean currents (Fig. 10d). In addition, several small, long, and narrow TMZs are accurately extracted through TMZI with the same criterion as that in the PRE and the HRE.

The results of the three estuaries and the comparison and accuracy assessment indicate that extracting TMZ based on TMZI and the criterion ( $TMZI > 0.2$ ) has a high applicability in multiple estuaries and different seasons.

### 3.5 Comparison with the previous methods

Previous studies have extracted TMZ based mainly on the threshold of TSS concentrations or turbidity. For example, Jalón-Rojas et al. (2016) used thresholds of 500 mg/L (300 NTU) and 1000 mg/L (600 NTU) to define moderately concentrated TMZ and highly concentrated TMZ in the Loire Estuary in France; Jiang et al. (2013) and Li et al. (2019) defined TMZ as the areas with TSS values larger than 700 mg/L in Yangtze Estuary and Hangzhou Bay. For TMZ in the PRE, it was found that TSS values in studies by Shi et al. (2017) and Wai et al. (2004) were more than 89.4 mg/L and about 150 mg/L, respectively. Based on the two criteria (TMZ:  $TSS > 89.4$  mg/L or  $TSS > 150$  mg/L), this study calculated and extracted TMZs in the PRE (Fig. 11c-f).

Compared to the visual interpretation TMZ results (Figs. 7a and 8c), the TMZ extraction results in the PRE based on the criterion of Shi et al. (2017) are superior to those of Wai et al. (2004), on November 20, 2004 (Fig. 11c vs. Fig. 11e, low-flow season) or October 18, 2015 (Fig. 11d vs. Fig. 11f, high-flow season). The extraction quality based on the criteria of Shi et al. (2017) and Wai et al. (2004) are 0.4238, 0.4770 and 0.1046, 0.1661, respectively. The primary reason may be that the time of the data source in Shi et al. (2017) was closer to the present study than that in the study by Wai

et al. (2004). This means that the criterion of Shi et al. (2017) was more suitable for this study than that of Wai et al. (2004).

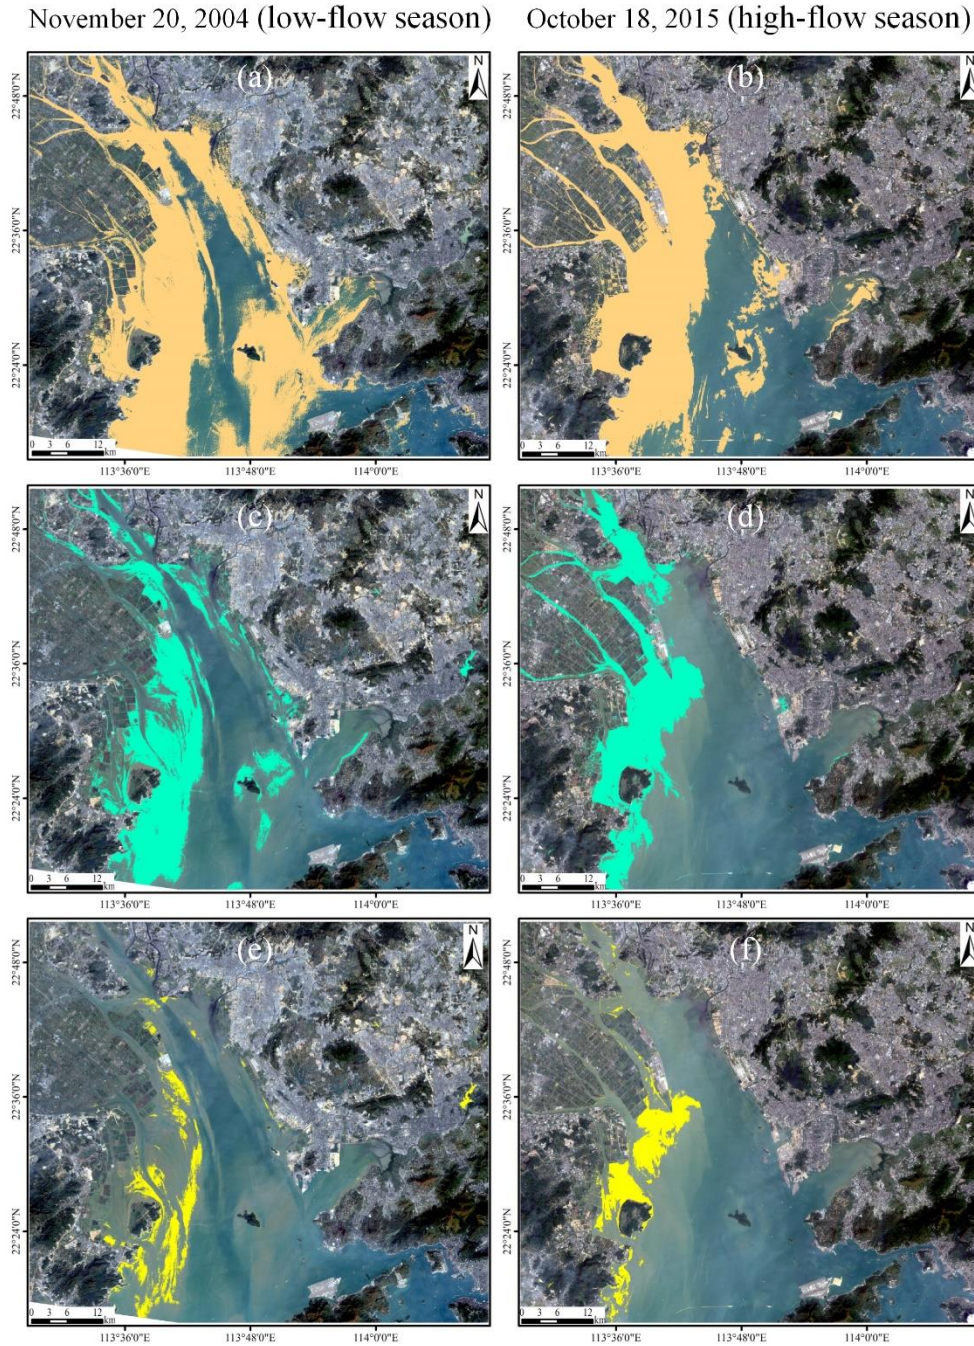

**Fig. 11.** The true color imagery (USGS 1982; NASA 2001) and TMZ extraction results in the PRE at different time (a, c, e: November 20, 2004; b, d, f: October 18, 2015) based on the TMZI method of this study (a and b, regions indicated by mango color, as in Fig. 7b and Fig. 8d), the criterion by



Shi et al. (2017) (c and d, regions indicated by cyan color), and the criterion by Wai et al. (2004) (e and f, regions indicated by yellow color).

It was also found that a relatively good result was obtained in the west shoal of the PRE on November 20, 2004, according to the criterion of Shi et al. (2017) (Fig. 11c). The extracted TMZs are almost consistent with the reality compared to the true color imagery and the visual interpretation TMZ results (Wang et al., 2020b, 2021). However, the accuracy in the east shoal and surrounding Neilingding Island of the PRE is lower than in the west shoal, where obvious distributions of TMZs are not recognized effectively (Fig. 11c). Furthermore, the same criterion does not work well in the western shoal of the PRE at different times (Fig. 11c vs. Fig. 11d). Almost one-third of the distributions of TMZs in the western shoal of the PRE during the high-flow season are not distinguished and extracted (Fig. 11d). The results based on the criteria of previous studies, indicate that fixed thresholds have a distinct disadvantage when extracting TMZ at different times or in estuaries.

Based on the evaluation and analysis of all the above results (Figs. 7-11), TMZI could be widely and effectively applied for the accurate extraction of estuarine TMZ, regardless of the significant variations in hydrodynamic environments, TSS and Chla concentrations in different estuaries and seasons. Compared to previous studies and the results from fixed thresholds, it is concluded that TMZI has significant potential to develop into a unified model for distinguishing and extracting TMZ effectively and accurately in many other estuaries globally (Q: 0.8171-0.8429 vs. 0.1046-0.4770).

## 4 Summary and Conclusions

This study established and developed a novel model (turbidity maximum zone index) based on TSS and Chla concentration, to distinguish estuarine turbidity maximum zone from Landsat imageries. It was found that both TSS and Chla concentrations showed significant variations and different characteristics in the PRE, the HRE and the MRE in different times (Figs. 4 and 8-10). A corresponding relationship between TSS and Chla concentrations in the three estuaries of Guangdong Province remains. In this study, the Chla and TSS concentrations showed almost opposite spatial distribution characteristics, where relatively high (low) Chla concentrations corresponded exactly to the relatively low (high) TSS concentrations (Figs. 4-5 and 8-10). Therefore, here, the turbidity maximum zone index (TMZI) was defined and designed as the ratio of the difference and sum of the logarithmic transformation of TSS and Chla concentrations.

Compared with the true (false) color imagery and the visual interpretation TMZ results, it was found that the TMZ extraction results by TMZI were consistent with the reality (Figs. 7-10; Q: 0.8171-0.8429). Notably, the criterion used for extracting TMZs in different estuaries and seasons was the same ( $TMZI > 0.2$ ). In addition, reasonable accuracy and a better performance were obtained by TMZI compared with the previous fixed TSS concentration or turbidity threshold (Fig. 11; Q: 0.8171-0.8429 vs. 0.1046-0.4770), demonstrating that TMZI has a higher adaptability and robustness.

The results of this study indicate that there is significant potential for optimizing TMZI to distinguish and extract TMZs from multi-source satellite remote sensing, such as Sentinel, Aqua & Terra-MODIS, Envisat MERIS and SeaWiFS. This will also assist in establishing and developing a global unified criterion for extracting TMZs effectively in different estuaries and at different times.

### **Code and data availability**

All the Landsat remote sensing imageries are fully available at <https://glovis.usgs.gov/> (USGS 1982; NASA 2001).

### **Author Contribution**

The individual contributions and responsibilities of the authors are listed as follows: Chongyang Wang and Li Wang designed the research and wrote the paper; Chenghu Zhou and Dan Li guided the research process; Danni Wang, Qiong Zheng, Hao Jiang, Kai Jia and Yangxiaoyue Liu collected and analyzed the data; Shuisen Chen, Ji Yang, Xia Zhou and Yong Li revised the manuscript, provided some comments and helped edit the manuscript. All authors have read and agreed to the published version of the manuscript.

### **Competing interests**

The authors declare that they have no conflict of interest.

## **Acknowledgements**

This work was funded jointly by National Natural Science Foundation of China (41801364), Natural Science Foundation of Guangdong Province (2021A1515012579), Key Special Project for Introduced Talents Team of Southern Marine Science and Engineering Guangdong Laboratory (Guangzhou) (GML2019ZD0301), Scientific Research Project approved by Department of Education of Guangdong Province (2019KQNCX209), Guangdong Innovative and Entrepreneurial Research Team Program (2016ZT06D336) and GDAS' Project of Science and Technology Development (2020GDASYL-20200104006, 2020GDASYL-20200302001, 2019GDASYL-0503001, 2019GDASYL-0301001 and 2019GDASYL-0501001). We would also like to thank USGS for providing the Landsat remote sensing imageries.

## **References**

Asp, N.E., Gomes, V., Schettini, C.A.F., Filho, P.W.S., Siegle, E., Ogston, A.s., Nittrouer, C.A., Silva, J.N.S., Nascimento, W.R., Jr, Souza, S.R., Pereira, L.C.C., Queiroz, M.C., 2018. Sediment dynamics of a tropical tide-dominated estuary: Turbidity maximum, mangroves and the role of the Amazon River sediment load. *Estuarine, Coastal and Shelf Science*.

Attila, J., Kauppila, P., Kallio, K.Y., Alasalmi, H., Keto, V., Bruun, E., Koponen, S., 2018. Applicability of Earth Observation chlorophyll-a data in assessment of

486 water status via MERIS-With implications for the use of OLCI sensor. Remote  
 487 Sensing of Environment. 212, 273-287.

488 Azhikodan, G., Yokoyama, K., 2019. Seasonal morphodynamic evolution in a  
 489 meandering channel of a macrotidal estuary. Science of the Total Environment.  
 490 684, 281-295.

491 Brenon, I., Hir, P.L., 1999. Modelling the Turbidity Maximum in the Seine Estuary  
 492 (France): Identification of Formation Processes. Estuarine, Coastal and Shelf  
 493 Science. 49, 525-544.

494 Cai, L., Shi, W., Miao, Z., & Hao, M. (2018). Accuracy Assessment Measures for  
 495 Object Extraction from Remote Sensing Images. Remote Sensing, 10, 303.

496 Chen, S., Fang, L., Li, H., Chen, W., Huang, W., 2011. Evaluation of a three-band  
 497 model for estimating chlorophyll-a concentration in tidal reaches of the Pearl River  
 498 Estuary, China. ISPRS Journal of Photogrammetry and Remote Sensing. 68, 356-  
 499 364.

500 Chen, S., Han, L., Chen, X., Li, D., Sun, L., Li, Y., 2015. Estimating wide range Total  
 501 Suspended Solids concentrations from MODIS 250-m imageries: An improved  
 502 method. ISPRS Journal of Photogrammetry and Remote Sensing. 99, 58-69.

503 Chen, X., Shen, Z., Yang, Y., 2016. Response of the turbidity maximum zone in the  
 504 Yangtze River Estuary due to human activities during the dry season.  
 505 Environmental Science and Pollution Research. 11, 1-16.



506 Feng, H., Cochran, J.K., Hirschberg, D.J., 2002. Transport and sources of metal  
507 contaminants over the course of tidal cycle in the turbidity maximum zone of the  
508 Hudson River estuary. *Water Research*. 36, 733-743.

509 Gebhardt, A.C., Schoster, F., Gaye-Haake, B., Beeskow, B., Rachold, V., Unger, D.,  
510 Ittekkot, V., 2005. The turbidity maximum zone of the Yenisei River (Siberia) and  
511 its impact on organic and inorganic proxies. *Estuarine, Coastal and Shelf Science*.  
512 65, 61-73.

513 Gong, S., Gao, A., Lin, J., Zhu, X., Zhang, Y., Hou, Y., 2017. Temporal-spatial  
514 distribution and its influencing factors of suspended particulate matters in  
515 Minjiang lower reaches and estuary. *Journal of Earth Sciences and Environment*.  
516 39(6), 826-836.

517 Grasso, F., Verney, R., Hir, P.L., Thouvenin, B., Schulz, E., Kervella, Y., Fard, I.K.P.,  
518 Lemoine, J.-P., Dumas, F., Garnie, V., 2018. Suspended Sediment Dynamics in the  
519 Macrotidal Seine Estuary (France) - Part 1: Numerical Modeling of Turbidity  
520 Maximum Dynamics. *Journal of Geophysical Research: Oceans*. 123, 558-577.

521 Gregg, W.W., Casey, N.W., 2004. Global and regional evaluation of the SeaWiFS  
522 chlorophyll data set. *Remote Sensing of Environment*. 93, 463-479.

523 Huang, B., Hong, H., Ke, L., Cao, Z., 2005. Size-fractionated phytoplankton biomass  
524 and productivity in the Zhujiang River Estuary in China. *Acta Oceanologica Sinica*.  
525 27, 180-186.

526 Jalón-Rojas, I., Schmidt, S., Sottolichio, A., Bertier, C., 2016. Tracking the turbidity  
527 maximum zone in the Loire Estuary (France) based on a long-term, high-  
528 resolution and high-frequency monitoring network. *Continental Shelf Research*.  
529 117, 1-11.

530 Jiang, J., He, Q., Zhu, L., Lin, J., 2019. Analysis of hydrodynamic features of the North  
531 Passage in the turbidity maximum, Changjinag Estuary. *Haiyang Xuebo*. 41(1),  
532 11-20.

533 Jiang, X., Lu, B., He, Y., 2013. Response of the turbidity maximum zone to fluctuations  
534 in sediment discharge from river to estuary in the Changjiang Estuary (China).  
535 *Estuarine, Coastal and Shelf Science*. 131, 24-30.

536 Kim, H.H., Ko, B.C., Nam, J.Y., 2016a. Predicting chlorophyll-a using Landsat 8 OLI  
537 sensor data and the non-linear RANSAC method –a case study of Nakdong River,  
538 South Korea. *International Journal of Remote Sensing*. 37, 3255-3271.

539 Kim, W., Moon, J.-E., Park, Y.-J., Ishizaka, J., 2016b. Evaluation of chlorophyll  
540 retrievals from Geostationary Ocean Color Imager (GOCI) for the North-East  
541 Asian region. *Remote Sensing of Environment*. 184, 482-495.

542 Kitheka, J.U., Mavuti, K.M., Nthenge, P., Obiero, M., 2016. The turbidity maximum  
543 zone in a shallow, well-flushed Sabaki estuary in Kenya. *Journal of Sea Research*.  
544 110, 17-28.

545 Le, C., Hu, C., Cannizzaro, J., English, D., Muller-Karger, F., Lee, Z., 2013. Evaluation  
 546 of chlorophyll-a remote sensing algorithms for an optically complex estuary.  
 547 Remote Sensing of Environment. 129, 75-89.

548 Le, C., Li, Y., Zha, Y., Sun, D., Huang, C., Lu, H., 2009. A four-band semi-analytical  
 549 model for estimating chlorophyll a in highly turbid lakes: The case of Taihu Lake,  
 550 China. Remote Sensing of Environment. 113, 1175-1182.

551 Li, L., Ye, T., Wang, X., Xia, Y., 2019. Tracking the multidecadal variability of the  
 552 surface turbidity maximum zone in Hangzhou Bay, China. International Journal of  
 553 Remote Sensing. 1-22.

554 Liu, H., Huang, L., Tan, Y., Ke, Z., Liu, J., Zhao, C., Wang, J., 2017. Seasonal variations  
 555 of chlorophyll a and primary production and their influencing factors in the Pearl  
 556 River Estuary. Journal of Tropical Oceanography. 36, 81-91.

557 Liu, R., Wang, Y., Gao, J., Wu, Z., Guan, W., 2016. Turbidity maximum formation and  
 558 its seasonal variations in the Zhujiang (Pearl River) Estuary, southern China. Acta  
 559 Oceanologica Sinica. 35, 22-31.

560 Mitchell, S., 2013. Turbidity maxima in four macrotidal estuaries. Ocean & Coastal  
 561 Management. 79, 62-69.

562 Mitchell, S., Akesson, L., Uncles, R., 2012. Observations of turbidity in the Thames  
 563 Estuary, United Kingdom. Water and Environment Journal. 26, 511-520.

564 Montanher, O., Novo, E., Barbosa, C., Renno, C., Silva, T., 2014. Empirical models for  
 565 estimating the suspended sediment concentration in Amazonian white water rivers

566 using Landsat 5/TM. International Journal of Applied Earth Observation and  
567 Geoinformation, 29, 67-77.

568 Park, K., Wang, H.V., Kim, S.-C., Oh, J.-H., 2008. A Model Study of the Estuarine  
569 Turbidity Maximum along the Main Channel of the Upper Chesapeake Bay.  
570 Estuaries and Coasts. 31, 115-133.

571 Pozdnyakov, D., Shuchman, R., Korosov, A., Hatt, C., 2005. Operational algorithm for  
572 the retrieval of water quality in the Great Lakes. Remote Sensing of Environment.  
573 97, 352-370.

574 Schubel, J., 1968. Turbidity maximum of the northern chesapeake bay. SCIENCE. 161,  
575 1013-1015.

576 Shen, H., 1995. New understanding on the study of the maximum turbidity zone in  
577 estuaries of China. Advence in Earth Sciences. 10, 210-212.

578 Shen, H., He, S., Mao, Z., Li, J., 2001. On the turbidity maximum in the Chinese  
579 estuaries. Journal of Sediment Research. 1, 23-29.

580 Shi, W., Shen, H., Li, J., 1993. Review on the formation of estuarine turbidity maximum.  
581 Advence in Earth Sciences. 8, 8-13.

582 Shi, Z., Xu, J., Huang, X., Zhang, X., Jiang, Z., Ye, F., Liang, X., 2017. Relationship  
583 between nutrients and plankton biomass in the turbidity maximum zone of the  
584 Pearl River Estuary. Journal of Environmental Sciences. 57, 72-84.

585 Song, K., Li, L., Tedesco, L.P., Li, S., Duan, H., Liu, D., Hall, B.E., Du, J., Li, Z., Shi,  
586 K., Zhao, Y., 2013. Remote estimation of chlorophyll-a in turbid inland waters:

587 Three-band model versus GA-PLS model. *Remote Sensing of Environment*. 136,  
588 342-357.

589 Toublanc, F., Brenon, I., Coulombier, T., 2016. Formation and structure of the turbidity  
590 maximum in the macrotidal Charente estuary (France)\_ Influence of fluvial and  
591 tidal forcing. *Estuarine, Coastal and Shelf Science*. 169, 1-14.

592 Uncles, R.J., Bloomer, N.J., Frickers, P.E., Griffiths, M.L., Harris, C., Howland, R.J.M.,  
593 Morris, A.W., Plummer, D.H., Tappin, A.D., 2000. Seasonal variability of salinity,  
594 temperature, turbidity and suspended chlorophyll in the Tweed Estuary. *The*  
595 *Science of the Total Environment*. 251/252, 115-124.

596 Wai, O.W.H., Wang, C.H., Li, Y.S., Li, X.D., 2004. The formation mechanisms of  
597 turbidity maximum in the Pearl River estuary, China. *Marine Pollution Bulletin*.  
598 48, 441-448.

599 Wan, Y., Wang, L., 2017. Numerical investigation of the factors influencing the vertical  
600 profiles of current, salinity, and SSC with in a turbidity maximum zone.  
601 *International Journal of Sediment Research*. 32, 20-33.

602 Wang, C., Chen, S., Li, D., Wang, D., liu, W., Yang, J., 2017a. A Landsat-based model  
603 for retrieving total suspended solids concentration of estuaries and coasts in China.  
604 *Geoscientific Model Development*. 10, 4347-4365.

605 Wang, C., Chen, S., Yang, J., Li, Y., Zhou, X., Li, D., Wang, D., 2020a. Monitoring total  
606 suspended solids concentrations in estuaries based on remote sensing. Beijing:  
607 China Water & Power Press.

608 Wang, C., Li, D., Wang, D., Chen, S., 2017b. Detecting the Temporal and Spatial  
609 Changes of Suspended Sediment Concentration in Hanjiang River Estuary During  
610 the Past 30 Years Using Landsat Imageries. Research Journal of Environmental  
611 Science. 11, 143-155.

612 Wang, C., Li, W., Chen, S., Li, D., Wang, D., Liu, J., 2018. The spatial and temporal  
613 variation of total suspended solid concentration in Pearl River Estuary during  
614 1987–2015 based on remote sensing. Science of the Total Environment. 618, 1125-  
615 1138.

616 Wang, C., Wang, D., Yang, J., Fu, S., Li, D., 2020b. Suspended Sediment within  
617 Estuaries and along Coasts: A Review of Spatial and Temporal Variations based  
618 on Remote Sensing. Journal of Coastal Research. 36, 1323-1331.

619 Wang, C., Zhou, C., Chen, S., Xie, Y., Li, D., Yang, J., Zhou, X., Li, Y., Wang, D., Liu,  
620 Y., 2021. Retrospect and perspective of the estuarine turbidity maximum zone  
621 researches. Chinese Science Bulletin. 66, 2328-2342.

622 Yan, D., Song, D., Bao, X., 2020. Spring-neap tidal variation and mechanism analysis  
623 of the maximum turbidity in the Pearl River Estuary during flood season. Journal  
624 of Tropical Oceanography. 39, 20-35.

625 Yang, J., Liu, W., 2015. Characteristics of the maximum turbidity zone in the  
626 lingdingyang-Pearl river estuary during the flood season in the recent 30 years.  
627 Pearl River Water Transport. 16, 58-62.

- 628 Yang, Y., Li, Y., Sun, Z., Fan, Y., 2014. Suspended sediment load in the turbidity  
629 maximum zone at the Yangtze River Estuary: The trends and causes. *Journal of*  
630 *Geographical Sciences*. 24, 129-142.
- 631 Yu, Q., Wang, Y., Gao, J., Gao, S., Flemming, B., 2014. Turbidity maximum formation  
632 in a well-mixed macrotidal estuary: The role of tidal pumping. *Journal of*  
633 *Geophysical Research: Oceans*. 119, 7705-7724.
- 634 Zhang, X., Chen, X., Dou, X., Zhao, X., Xia, W., Jiao, J., Xu, H., 2019. Study on  
635 formation mechanism of turbidity maximum zone and numerical simulations in  
636 the macro tidal estuaries. *Advances in Water Science*. 30, 84-92.
